# Supplementary material
Source: ML conference proceedings conference paper supplement (https://proceedings.mlr.press/v85/mahmood18a.html)
Supplement: Supplementary file [file mahmood18a-supp.pdf]

## Appendix A. Network architecture

The general network architecture was adapted from [Isola et al. \(2017\)](#). Contoured CT slices were used as input to the generator as 3-channel,  $128 \times 128$  images. We used a U-net architecture, where the generator was comprised of an encoder and a decoder stage. We used  $4 \times 4$  2D convolutions with stride 2 and padding 1. Each convolution layer was followed by a leaky ReLU and batch normalization. Deconvolution layers were followed by 50% dropout, ReLU, and batch normalization.

The encoder consisted of four downsampling layers. The first generated 64 channels, and each subsequent layer downsampled by a factor of 2. This was followed by 2 bottleneck layers, before the data was then passed through 4 upsampling layers. The output of each downsample layer was concatenated to the input of the corresponding upsample layer. The final output was a 3-channel,  $128 \times 128$  slice.

The decoder consisted of five convolution layers, where the first four each downsample the output by 2. The fifth, and last layer, mapped to a scalar output. Once again, we applied batch normalization and leaky ReLU after the first four layers. The final layer was passed through sigmoid activation.

## Appendix B: Random forest architecture

| Feature                 | Description                                                  |
|-------------------------|--------------------------------------------------------------|
| Structure               | Structure that the voxel is classified as                    |
| $y$ -coordinate         | Voxel’s positions on the $y$ -axis in a slice                |
| $z$ -coordinate         | Plane of voxel’s slice                                       |
| Distance to larynx      | Shortest path between voxel and the surface of the larynx    |
| Distance to esophagus   | Shortest path between voxel and the surface of the esophagus |
| Distance to limPostNeck | Shortest path between voxel the surface of the limPostNeck   |
| Distance to PTV56       | Shortest path between voxel and the surface of the PTV56     |
| Distance to PTV63       | Shortest path between voxel and the the surface of PTV63     |
| Distance to PTV70       | Shortest path between voxel and the the surface of PTV70     |
| Influence               | Sum of influence matrix elements for the voxel               |

Table 4: The ten features used in the RF to predict the dose for any voxel.

The random forest used ten custom features outlined in [Table 5](#) to predict the dose delivered to each voxel in the patient. The RF was trained with ten trees, and default settings with the `randomForestRegressor` from `scikit-learn`.
